# Supplementary figures and images for: Skeletal Muscle Energetics and Mitochondrial Function Are Impaired Following 10 Days of Bed Rest in Older Adults
Source: PubMed Central journal article supplement — J Gerontol A Biol Sci Med Sci. 2020 Jan 7;75(9):1744–53. doi: 10.1093/gerona/glaa001 (PMC7494044; doi:10.1093/gerona/glaa001), 2020-01-07

Supplemental Figure 1.

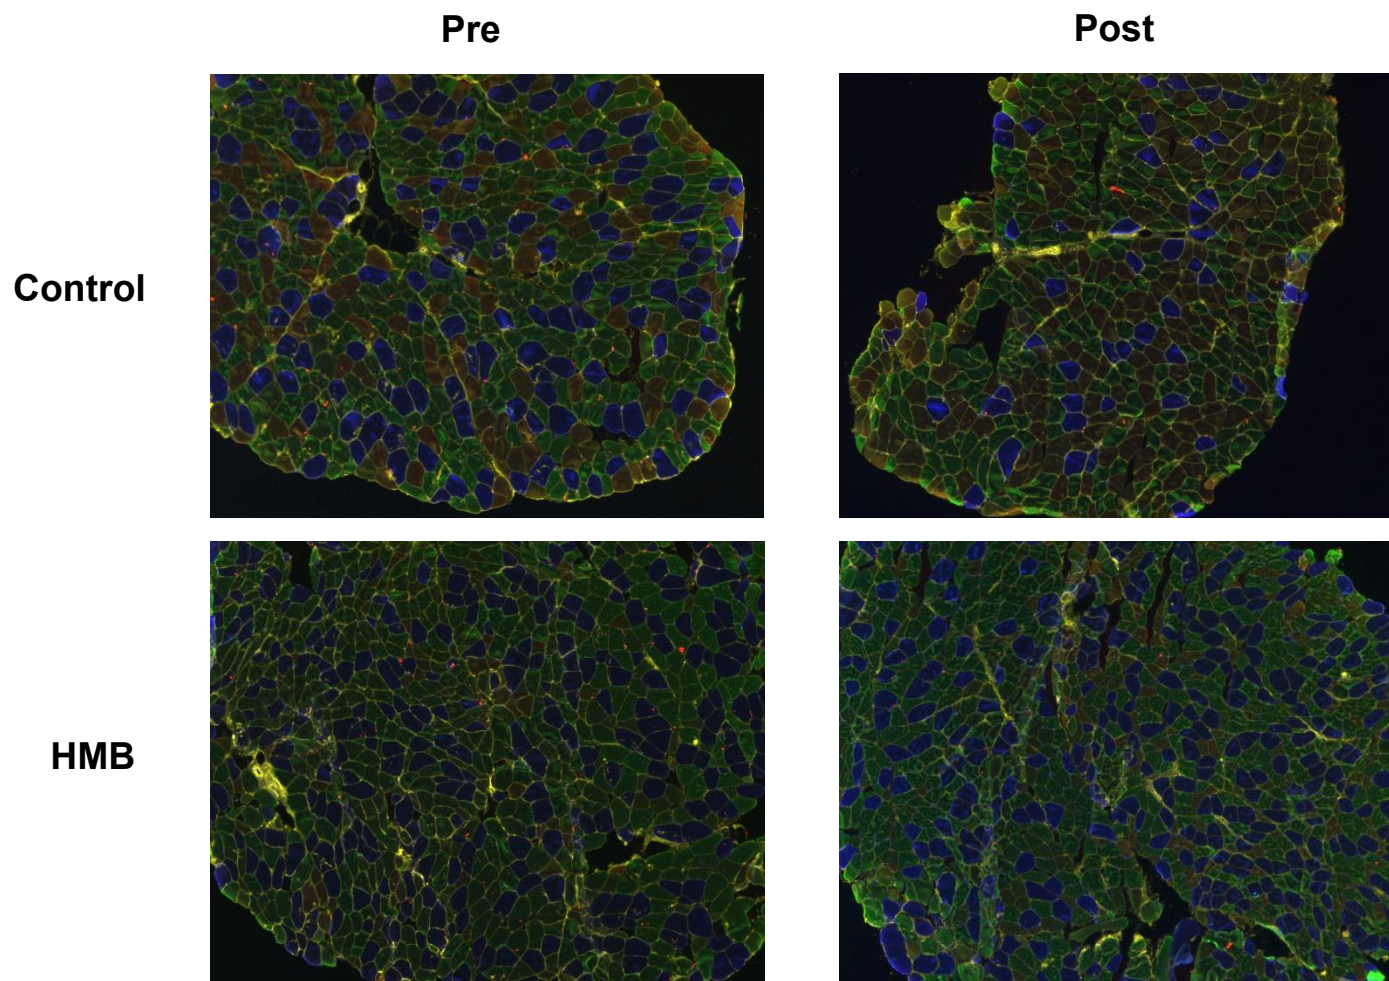

Supplement: glaa001_suppl_supplemental_figure_1.pdf [file glaa001_suppl_supplemental_figure_1.pdf]

# Supplemental Figure 2.

A.

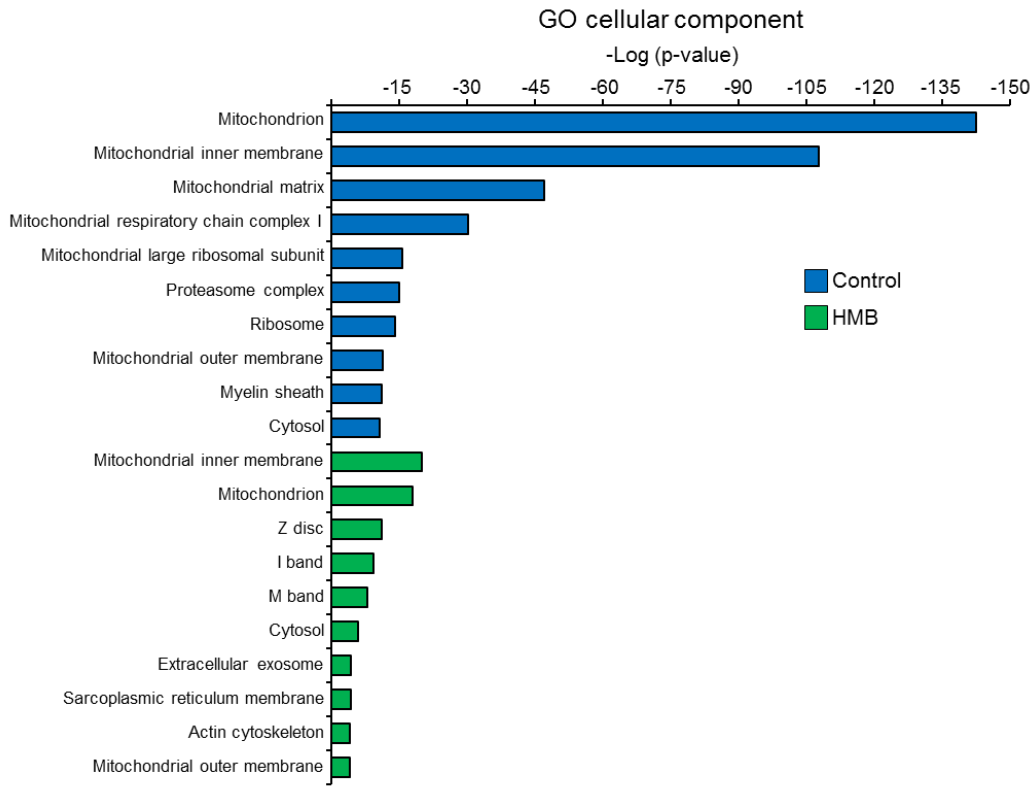

B.

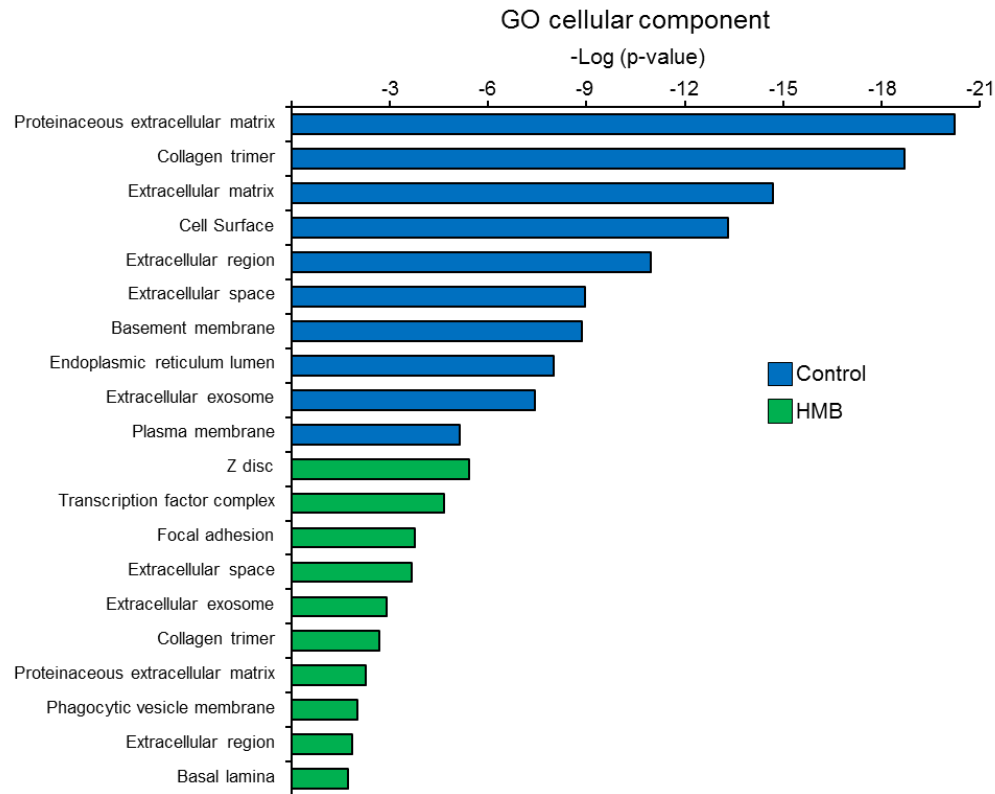

Supplement: glaa001_suppl_supplemental_figure_2.pdf [file glaa001_suppl_supplemental_figure_2.pdf]

# Supplemental Figure 3.

**A.**

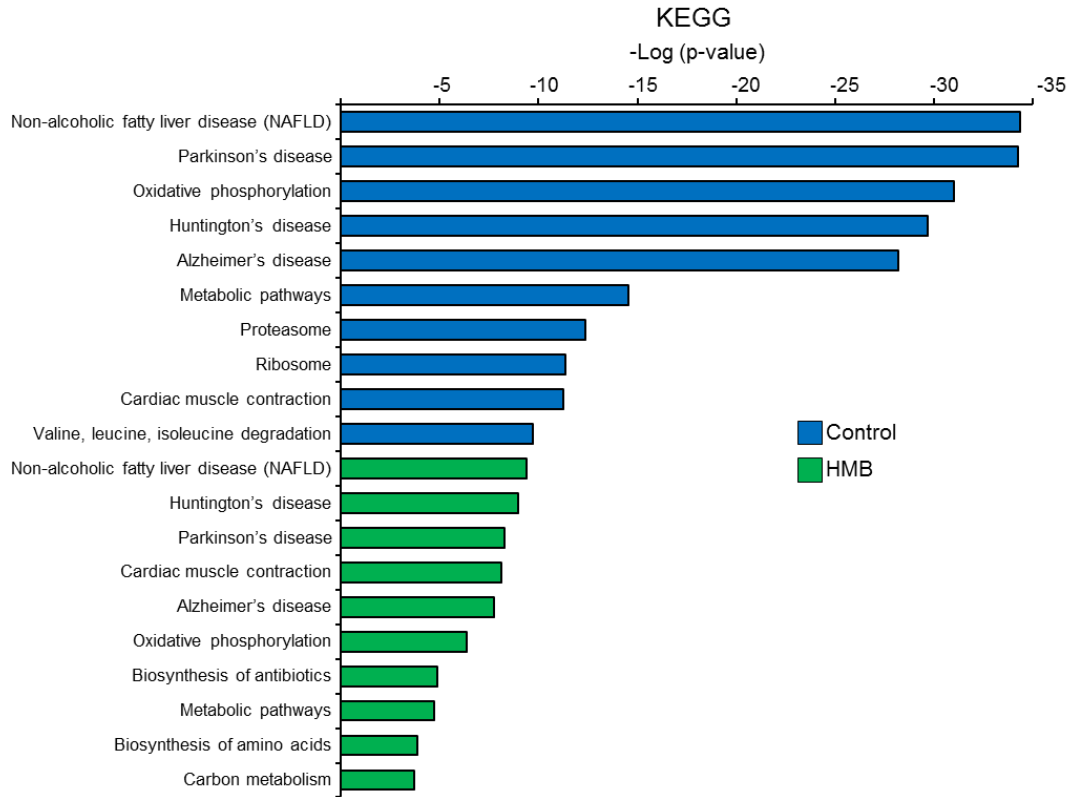

**B.**

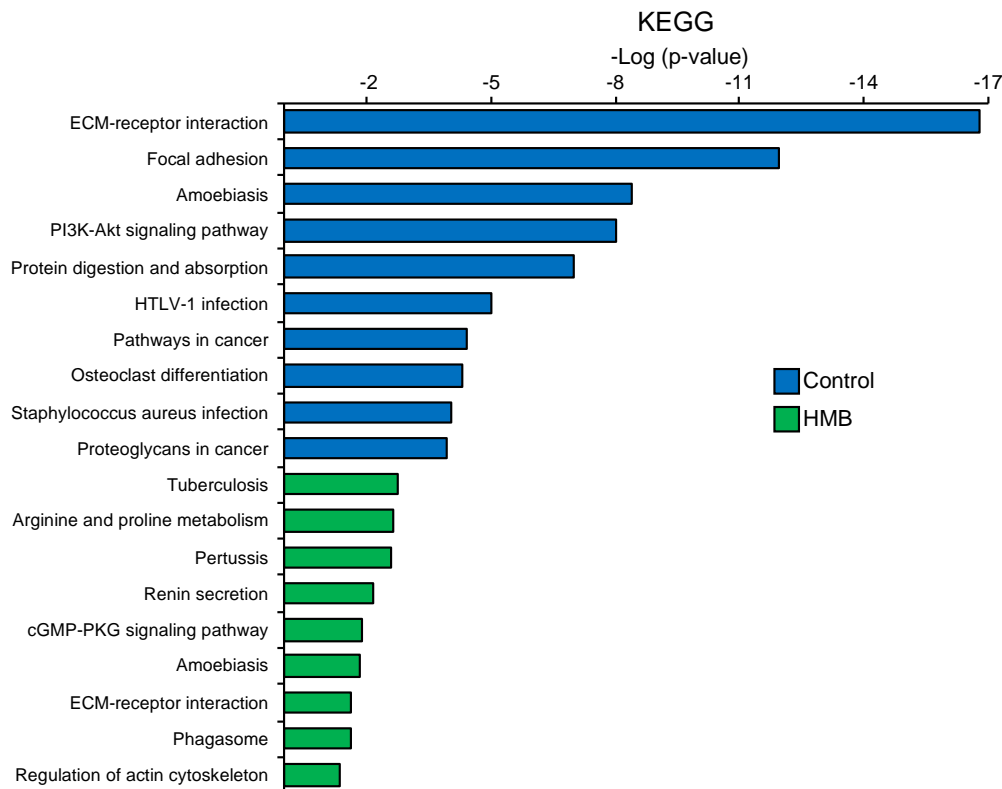

Supplement: glaa001_suppl_supplemental_figure_3.pdf [file glaa001_suppl_supplemental_figure_3.pdf]

Supplemental Figure 4.

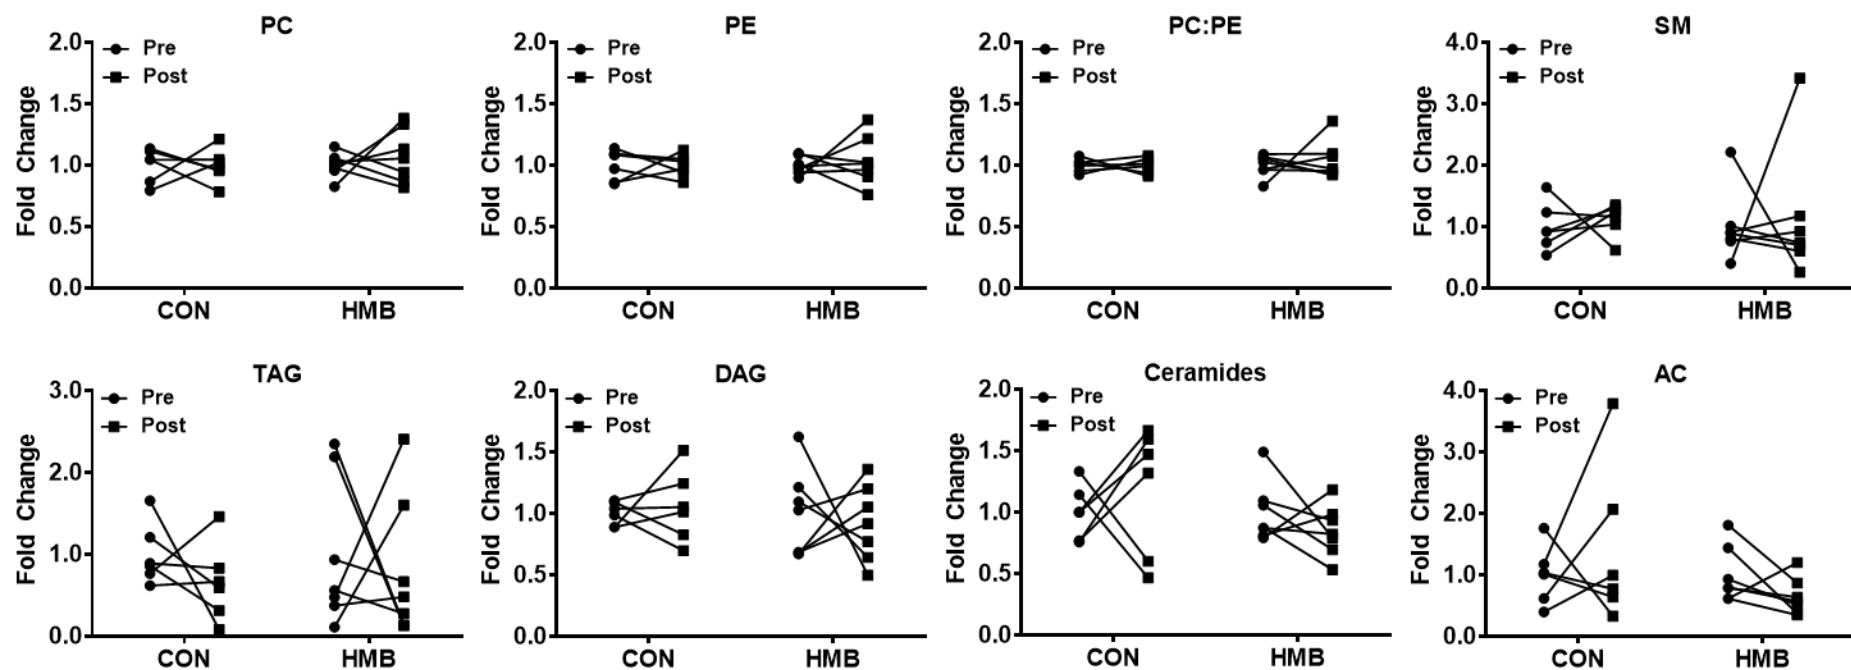

Supplement: glaa001_suppl_supplemental_figure_4.pdf [file glaa001_suppl_supplemental_figure_4.pdf]
